1 **Evolutionary dynamics of carbapenem-resistant *Acinetobacter baumannii***  
2 **circulating in Chilean hospitals**

3

4 **Andrés Opazo-Capurro<sup>a,b,#</sup>, Iván San Martín<sup>a</sup>, Mario Quezada-Aguiluz<sup>a</sup>, Felipe**  
5 **Morales<sup>a,c</sup>, Mariana Domínguez-Yévenes<sup>a</sup>, Celia A. Lima<sup>a</sup>, Fernanda Esposito<sup>d</sup>, Louise**  
6 **Cerdeira<sup>d</sup>, Helia Bello-Toledo<sup>a</sup>, Nilton Lincopan<sup>d,e</sup>, Gerardo González-Rocha<sup>a,b,#</sup>.**

7

8 <sup>a</sup>Laboratorio de Investigación en Agentes Antibacterianos (LIAA-UdeC), Departamento de  
9 Microbiología, Facultad de Ciencias Biológicas, Universidad de Concepción, Chile

10 <sup>b</sup>Millennium Nucleus for Collaborative Research on Bacterial Resistance (MICROB-R)

11 <sup>c</sup>Departamento de Farmacia, Facultad de Farmacia, Universidad de Concepción, Chile.

12 <sup>d</sup>Department of Clinical Analysis, School of Pharmacy, University of São Paulo, São Paulo,  
13 Brazil

14 <sup>e</sup>Department of Microbiology, Institute of Biomedical Sciences, University of São Paulo,  
15 São Paulo, Brazil

16

17 Running Head: Carbapenem-resistant *A. baumannii* in Chilean Hospitals

18

19

20

21 #Address correspondence to: A. Opazo-Capurro, andopazo@udec.cl and G. González-  
22 Rocha, ggonzal@udec.cl

23

24 **ABSTRACT**

25 We analyze the evolutionary dynamics of ninety carbapenem-resistant *Acinetobacter*  
26 *baumannii* (CRAB) isolates collected between 1990 and 2015 in Chile. CRAB were  
27 identified at first in an isolate collected in 2005, which harbored the *ISAbal-bla<sub>OXA-69</sub>*  
28 arrangement. Later, OXA-58- and OXA-23-producing *A. baumannii* strains emerged in  
29 2007 and 2009, respectively. This phenomenon was associated with variations in the  
30 epidemiology of OXA-type carbapenemases, linked to nosocomial lineages belonging to  
31 ST109 (CC1), ST162 (CC79), ST15 (CC15) and ST318 (CC15).

32

33

34

35

36

37

38

39

40

41

42

43

44

45

46

47 Carbapenem-resistant *Acinetobacter baumannii* (CRAB) has been deemed a critical-  
48 priority pathogen by the World Health Organization (WHO) (1). It is normally involved in  
49 infections acquired in the intensive care units (ICUs), and is commonly resistant to several  
50 antibiotics, including carbapenems (2). Accordingly, OXA-type carbapenemases (OTCs)  
51 are the main resistance mechanism to carbapenems in *A. baumannii* (3). While OXA-51-  
52 like carbapenemases are chromosomally encoded, the remaining OTCs (OXA-23-like, -24-  
53 like, -58-like and -143-like) are frequently plasmid encoded (4, 5). OXA-51-like enzymes  
54 can mediate resistance to carbapenems if they are overexpressed when the *ISAbal* element  
55 is present upstream of the *bla*<sub>OXA-51-like</sub> gene (6). CRAB outbreaks are commonly associated  
56 to the three predominant clonal complexes (CCs) CC109/1, CC118/2 and CC187/3  
57 (University of Oxford/Institute Pasteur MLST schemes) (7). Although, the clonal complex  
58 CC113/CC79 has been predominant in South America; CC104/CC15, CC110/ST25 and  
59 CC109/CC1 are also present in this region (8).

60 The aim of this study was to investigate the evolutionary dynamics of CRAB in  
61 Chilean hospitals, where this pathogen has an endemic status.

62 Ninety non-repetitive *A. baumannii* isolates recovered between 1990 and 2015 were  
63 included. They were collected in hospitals from nine different cities throughout Chile, in  
64 which the greatest distance between two cities is 2,433 km, representing over 50% of the  
65 length of the country.

66 Antibiotic susceptibility tests were performed to carbapenems, cephalosporins,  
67 aminoglycosides, ampicillin/sulbactam, piperacillin/tazobactam, ciprofloxacin, and  
68 tetracycline (9). Imipenem (IPM) and meropenem (MEM) MICs were determined  
69 following the CLSI guidelines (9). Colistin-resistance was screened using the

70 SuperPolymyxin media (10). Multidrug-resistant (MDR), extensively-drug resistant (XDR)  
71 and pandrug-resistant (PDR) phenotypes were defined as previously described (11, 12).

72 Genetic relatedness was determined by pulsed-field gel electrophoresis (PFGE) as  
73 described earlier (13). Groups with at least three genetically related isolates (>87%  
74 similarity) were designated as major PFGE clusters (14). Single-locus *bla*<sub>OXA-51-like</sub>  
75 sequence-based typing (SBT) was carried out as described previously (15). Isolates  
76 representative of the main PFGE clusters were subjected to whole-genome sequencing  
77 (WGS), and sequence types (STs) were determined (Pasteur's scheme) as published earlier  
78 (16).

79 OTCs genes were screened by multiplex-PCR (17), whereas *bla*<sub>OXA-51-like</sub> alleles  
80 were investigated by PCR and sequencing. *ISAbal-bla*<sub>OXA-51-like</sub> array was examined by  
81 conventional PCR (18). CarbAcinetoNP test was performed on all carbapenem non-  
82 susceptible isolates that were negative for *bla*<sub>OXA</sub> genes (19).

83 The comprised isolates were grouped into three different periods: P1 (1990-1999,  
84 *n*= 27), P2 (2000-2009, *n*= 30), and P3 (2010-2015, *n*= 33). Consequently, carbapenem  
85 resistance was confirmed in 56 (62%) isolates, being identified for the first time in 2005 in  
86 a strain (A329, P2) carrying the *ISAbal-bla*<sub>OXA-69</sub> array (Figure 1). XDR, MDR or PDR  
87 profiles were displayed by 51 (57%), 28 (31%) and 3 (3%) isolates, respectively.  
88 Furthermore, 65 (72%) isolates were non-susceptible to amikacin, whereas 64 (71%) were  
89 non-susceptible to gentamicin. Additionally, 32 (36%) isolates exhibited resistance to  
90 ampicillin-sulbactam, and 4 (3.6%) were colistin-resistant.

91 Further, *bla*<sub>OXA-58</sub> (30%) and *bla*<sub>OXA-23</sub> (30%) genes were more prevalent and were  
92 associated with highest carbapenems MICs (Figure 1). The *ISAbal-bla*<sub>OXA-219</sub> array was  
93 observed in 14 of 56 (25%) CRAB isolates. In this regard, OXA-58-producing isolates

94 seems to have emerged in 2007, whereas *ISAbal*-OXA-219 and OXA-23 producers arose  
95 in 2009, being disseminated among different hospitals.

96 As expected, no OTC producers were identified in P1. Otherwise, eleven OXA-58-,  
97 seven OXA-23-, and four *ISAbal*-*bla*<sub>OXA-51</sub>-like-positive CRAB isolates were detected in  
98 P2 (Figure 1). In P3, a change in the molecular epidemiology of circulating OTCs was  
99 observed, where OXA-23 producers ( $n= 11$ ) were predominant, followed by OXA-51-like  
100 (associated with *ISAbal*,  $n= 15$ )- and OXA-58 ( $n= 4$ )-positive isolates (Figure 1).  
101 Interestingly, the CRAB isolate A223 was negative for both CarbAcinetoNP and OTCs  
102 PCR. Thus carbapenem-resistance could be mediated by a different mechanism (2).

103 Four major clusters (I – IV) were identified by PFGE (Figure 1). Cluster I included  
104 four carbapenem-susceptible isolates from P1, while cluster II comprised CRABs from  
105 2015 that harbored the OXA-23-like ( $n=3$ ) and *ISAbal*-*bla*<sub>OXA-219</sub> array ( $n=5$ ), which were  
106 collected from two hospitals separated by >1000 km (Figure 1). Cluster III contained three  
107 CRABs carrying *bla*<sub>OXA-23-like</sub> genes and the OXA-51-like variants OXA-51 and OXA-69.  
108 Finally, cluster IV included three isolates from three different cities, comprising a single  
109 OXA-58-like-producing CRAB (Figure 1). Four isolates were non-typeable.

110 Fifteen *bla*<sub>OXA-51</sub>-like variants were identified from SBT, where most prevalent  
111 alleles were OXA-51 ( $n= 21$ ), OXA-67 ( $n= 20$ ) and OXA-219 ( $n= 18$ ) (Figure 1). They are  
112 not associated to the three predominant international clones (ICs). Furthermore, isolates  
113 from PFGE cluster I corresponded to ST109, whereas those from clusters II and III  
114 belonged to ST15 and ST162, respectively (Figure 1). In cluster IV, two isolates from P1  
115 belonged to ST109, whereas a single isolate (A462) from P3 corresponded to ST318, which  
116 is part of the CC15.

117 In Chile, CRAB has been responsible for about 26% of ventilator-associated  
118 pneumonia (VAP) in hospitalized adults (20), whereas carbapenem-resistance rates are  
119 above 66% (21). Our results reveal the evolutionary dynamics of CRAB in the country,  
120 focusing on the major carbapenem resistance genes and lineages circulating in hospital  
121 settings in a period of 25 years.

122 Worryingly, XDR isolates were predominant in our collection, including resistance  
123 to aminoglycosides and ampicillin/sulbactam, in concordance with previous reports in the  
124 country (22). Although the rate of colistin resistance was 3.6%, this percentage is higher  
125 than the previously published in 2012 (1.4%) (22), representing an alarming increase to be  
126 considered CRAB has been increasing lately worldwide, and our results reveal that initially  
127 in Chile it was related to the *ISAbal-bla<sub>OXA-69</sub>* array identified in 2005, where ISs play an  
128 essential role in the regulation of this resistance (23).

129 Concerning to acquired OTCs, OXA-58-like-producing isolates seem to have  
130 emerged in 2007, whereas OXA-23-like producers arose later (3, 24). Significantly, after  
131 2010 a new change in the molecular epidemiology of circulating OTCs was observed,  
132 where OXA-23 producers have been predominant and widely disseminated along the  
133 country. Additionally, we detected the replacement of certain carbapenem-susceptible  
134 clones present in P1, by carbapenem-resistant lineages that began to emerge in the late  
135 2000s. SBT revealed that the CRAB isolates were not related to the major ICs (I-III). The  
136 main OXA-51-like variants present were OXA-219, OXA-67 and OXA-51. Of these,  
137 OXA-51 has been associated with the CC15 (15), previously detected in Europe, Pakistan  
138 and South America, which is considered as a high-risk clone (25). In South America, this  
139 CC is categorized as epidemic in Brazil (26), which suggests the dissemination of resistant  
140 clones through the region. Otherwise, OXA-67 and OXA-219 are related to less prevalent

141 ICs (15). Interestingly, OXA-219 was originally identified in 2012 from a single isolate  
142 from Chile, being related to the worldwide (WW) clone 4 (27), associated to the *ISAbal-*  
143 *bla*<sub>OXA-219</sub> array. These results suggest the presence of an endemic lineage (WW4, OXA-  
144 219) coexisting with a regional lineage (ST15) in Chile (8, 28), which has been described in  
145 Brazil (29) and Ecuador (28).

146 Other identified lineages included ST109 (CC1), ST162 (CC79), and ST318  
147 (CC15). ST109 has been originally identified in Sweden (30), whereas ST162 and ST318  
148 have been described in Brazil (29, 31). These findings reaffirm that the major lineages  
149 present in the region are different to those globally spread (8). However, ICII and III have  
150 been lately identified in Peru (32), which might have an important impact on the local  
151 epidemiology.

152 In conclusion, our study provides data about evolutionary dynamics of CRAB  
153 circulating in Chilean hospitals, which were linked to particular lineages as well as to the  
154 emergence of specific OTCs, whereas colistin resistance deserves an urgent attention to  
155 strengthen surveillance.

156

157

158

159

160

161

162

163

164

165

## 166 **ACKNOWLEDGMENTS**

167 The authors want to thank to the National Fund for Scientific and Technological  
168 Development (FONDECYT) for supporting this study. The authors also want to thank the  
169 microbiologists of the hospitals and medical centers who kindly provided the isolates  
170 including in this project. N.L. is a research grant fellow of Conselho Nacional de  
171 Desenvolvimento Científico (CNPq 312249/2017-9). This work was partially presented at  
172 the American Society for Microbiology (ASM) Microbe 2016 meeting, Boston, USA.

173

## 174 **CONFLICT OF INTEREST STATEMENT**

175 None to declare.

176

## 177 **FUNDING SOURCE.**

178 This work was supported through funds granted by the National Fund for Scientific and  
179 Technological Development (FONDECYT) of Chile (project N°3150286), the Universidad  
180 de Concepción (project ENLACE-VRID N°216.036.044-1.0), Fundação de Amparo à  
181 Pesquisa do Estado de São Paulo, Brazil (FAPESP 2016/08593-9) and Conselho Nacional  
182 de Desenvolvimento Científico, Brazil (CNPq 462042/2014-6).

183

184

185

186

187

188



189

190 **REFERENCES.**

- 191 1. World Health Organization (WHO). 2017. Global priority list of antibiotic-resistant  
192 bacteria to guide research, discovery, and development of new antibiotics.
- 193 2. Peleg AY, Seifert H, Paterson DL. 2008. *Acinetobacter baumannii*: emergence of a  
194 successful pathogen. Clin Microbiol Rev 21:538–82.
- 195 3. Opazo A, Domínguez M, Bello H, Amyes SGB, González-Rocha G. 2012. OXA-  
196 type carbapenemases in *Acinetobacter baumannii* in South America. J Infect Dev  
197 Ctries 6:311–6.
- 198 4. Evans BA, Amyes SGB. 2014. OXA  $\beta$ -lactamases. Clin Microbiol Rev 27:241–263.
- 199 5. Evans BA, Hamouda A, Amyes SGB. 2013. The rise of carbapenem-resistant  
200 *Acinetobacter baumannii*. Curr Pharm Des 19:223–38.
- 201 6. Turton JF, Ward ME, Woodford N, Kaufmann ME, Pike R, Livermore DM, Pitt TL.  
202 2006. The role of IS*Aba1* in expression of OXA carbapenemase genes in  
203 *Acinetobacter baumannii*. FEMS Microbiol Lett 258:72–7.
- 204 7. Martins N, Picão RC, Cerqueira-Alves M, Uehara A, Barbosa LC, Riley LW,  
205 Moreira BM. 2016. A new trilocus sequence-based multiplex-PCR to detect major  
206 *Acinetobacter baumannii* clones. Infect Genet Evol 42:41–45.
- 207 8. Higgins PG, Dammhayn C, Hackel M, Seifert H. 2010. Global spread of  
208 carbapenem-resistant *Acinetobacter baumannii*. J Antimicrob Chemother 65:233–  
209 238.
- 210 9. Clinical and Laboratory Standards Institute. 2017. CLSI. Performance Standards for  
211 Antimicrobial Susceptibility Testing. 27th ed. CLSI supplement M100. Wayne, PA:  
212 Clinical and Laboratory Standards Institute; 2017.

- 213 10. Nordmann P, Jayol A, Poirel L. 2016. A universal screening culture medium for  
214 polymyxin-resistant Gram-negative bacteria. *J Cyst Fibros* 15:1395–1399.
- 215 11. Vikas Manchanda, Sinha Sanchaita NS. 2010. Multidrug Resistant *Acinetobacter*. *J*  
216 *Glob Infect Dis* 291–304.
- 217 12. Magiorakos A-P, Srinivasan A, Carey RB, Carmeli Y, Falagas ME, Giske CG,  
218 Harbarth S, Hindler JF, Kahlmeter G, Olsson-Liljequist B, Paterson DL, Rice LB,  
219 Stelling J, Struelens MJ, Vatopoulos A, Weber JT, Monnet DL. 2012. Multidrug-  
220 resistant, extensively drug-resistant and pandrug-resistant bacteria: an international  
221 expert proposal for interim standard definitions for acquired resistance. *Clin*  
222 *Microbiol Infect* 18:268–81.
- 223 13. Seifert H, Dolzani L, Bressan R, van der Reijden T, van Strijen B, Stefanik D,  
224 Heersma H, Dijkshoorn L. 2005. Standardization and interlaboratory reproducibility  
225 assessment of pulsed-field gel electrophoresis-generated fingerprints of  
226 *Acinetobacter baumannii*. *J Clin Microbiol* 43:4328–35.
- 227 14. Al-Sultan AA, Evans BA, Aboulmagd E, Al-Qahtani AA, Bohol MFF, Al-Ahdal  
228 MN, Opazo AF, Amyes SGB. 2015. Dissemination of multiple carbapenem-resistant  
229 clones of *Acinetobacter baumannii* in the Eastern District of Saudi Arabia. *Front*  
230 *Microbiol* 6:1–7.
- 231 15. Pournaras S, Gogou V, Giannouli M, Dimitroulia E, Dafopoulou K, Tsakris A,  
232 Zarrilli R. 2014. Single-locus-sequence-based typing of *bla*<sub>OXA-51-like</sub> genes for rapid  
233 assignment of *Acinetobacter baumannii* clinical isolates to international clonal  
234 lineages. *J Clin Microbiol* 52:1653–7.
- 235 16. Larsen M V., Cosentino S, Rasmussen S, Friis C, Hasman H, Marvig RL, Jelsbak L,  
236 Sicheritz-Pontén T, Ussery DW, Aarestrup FM, Lund O. 2012. Multilocus sequence

- 237 typing of total-genome-sequenced bacteria. *J Clin Microbiol* 50:1355–1361.
- 238 17. Higgins PG, Lehmann M, Seifert H. 2010. Inclusion of OXA-143 primers in a  
239 multiplex polymerase chain reaction (PCR) for genes encoding prevalent OXA  
240 carbapenemases in *Acinetobacter* spp. *Int J Antimicrob Agents* 35:305.
- 241 18. Ruiz M, Marti S, Fernandez-Cuenca F, Pascual A, Vila J. 2007. Prevalence of  
242 IS(Aba1) in epidemiologically unrelated *Acinetobacter baumannii* clinical isolates.  
243 *FEMS Microbiol Lett* 274:63–6.
- 244 19. Dortet L, Poirel L, Errera C, Nordmann P. 2014. CarbAcineto NP test for rapid  
245 detection of carbapenemase- producing *Acinetobacter* spp. *J Clin Microbiol*  
246 52:2359–2364.
- 247 20. Otaíza F, Orsini M, Pohlenz M, Sepúlveda D. 2014. Informe de Vigilancia de  
248 Infecciones Asociadas a la Atención en Salud 2014. Ministerio de Salud,  
249 Departamento de Calidad y Formación programa Control IAAS 54–56.
- 250 21. Instituto de Salud Pública de Chile (ISPCH). 2015. Boletín de resistencia  
251 antimicrobiana. Programa Control Infecciones Asociadas a la atención en salud.
- 252 22. Cifuentes M, Silva F, García P, Bello H, Briceño I, Calvo M, Labarca J. 2014.  
253 Susceptibilidad Antimicrobiana en Chile 2012. *Rev Chil Infectología* 31:123–130.
- 254 23. Perez F, Hujer AM, Hujer KM, Decker BK, Rather PN, Bonomo RA. 2007. Global  
255 challenge of multidrug-resistant *Acinetobacter baumannii*. *Antimicrob Agents*  
256 *Chemother.*
- 257 24. Rodríguez CH, Nastro M, Famiglietti A. 2018. Carbapenemases in *Acinetobacter*  
258 *baumannii*. Review of their dissemination in Latin America. *Rev Argent Microbiol*  
259 13:30178–5.
- 260 25. Karah N, Sundsfjord A, Towner K, Samuelsen Ø. 2012. Insights into the global

- 261           molecular epidemiology of carbapenem non-susceptible clones of *Acinetobacter*  
262           *baumannii*. Drug Resist Updat 15:237–247.
- 263   26.   Pagano M, Rocha L, Sampaio JLM, Martins AF, Barth AL. 2017. Emergence of  
264           OXA-72-producing *Acinetobacter baumannii* Belonging to High-Risk Clones (CC15  
265           and CC79) in Different Brazilian States. Infect Control Hosp Epidemiol 38:252–254.
- 266   27.   Zander E, Nemeč A, Seifert H, Higgins PG. 2012. Association between  $\beta$ -lactamase-  
267           encoding bla(OXA-51) variants and DiversiLab rep-PCR-based typing of  
268           *Acinetobacter baumannii* isolates. J Clin Microbiol 50:1900–4.
- 269   28.   Rodriguez CH, Balderrama N, Nastro M, Nuñez T, Castro G, Magne R, Ugarte T,  
270           Valenzuela N, Roach F, Mota MI, Burger N, Velazquez G, Ortellado-Canese J,  
271           Bruni G, Pandolfo C, Bastyas N, Famiglietti A. 2016. Molecular epidemiology of  
272           carbapenem-resistant *Acinetobacter baumannii* in South America. J Med Microbiol  
273           65:1088–1091.
- 274   29.   Chagas TPG, Carvalho KR, de Oliveira Santos IC, Carvalho-Assef APDA, Asensi  
275           MD. 2014. Characterization of carbapenem-resistant *Acinetobacter baumannii* in  
276           Brazil (2008-2011): Countrywide spread of OXA-23-producing clones (CC15 and  
277           CC79). Diagn Microbiol Infect Dis 79:468–472.
- 278   30.   Hamidian M, Nigro SJ, Hall RM. 2017. Problems with the Oxford multilocus  
279           sequence typing scheme for *Acinetobacter baumannii*: Do sequence type 92 (ST92)  
280           and ST109 exist? J Clin Microbiol 55:2287–2289.
- 281   31.   Camargo CH, Tiba MR, Saes MR, Mahnic De Vasconcellos F, Fernando L, Santos  
282           D, Romero EC, De D, Garcia O. 2016. Population Structure Analysis of  
283           Carbapenem-Resistant *Acinetobacter baumannii* Clinical Isolates from Brazil  
284           Reveals Predominance of Clonal Complexes 1, 15, and 79. Antimicrob Agents

- 285 Chemother 60:2545–47.
- 286 32. Levy-blichtein S, Roca I, Plasencia-rebata S, Vicente-taboada W, Velásquez-pomar  
287 J, Muñoz L, Moreno-morales J, Pons MJ, Valle-mendoza J, Vila J. 2018. Emergence  
288 and spread of carbapenem- resistant *Acinetobacter baumannii* international clones II  
289 and III in Lima , Peru. Emerg Microbes Infect 7:119.
- 290

- 1 Figure 1. Dendrogram generated after restriction with *ApaI* enzyme for 86/90 typed *A.*
- 2 *baumannii* isolates. The black dotted line represents 87% similarity. I to IV denote the
- 3 major PFGE groups characterized according to the criteria described in the manuscript.
- 4 MDR: multidrug-resistant; XDR: extensively-drug resistant; PDR: pandrug-resistant; OTC:
- 5 OXA-type carbapenemase; ST: Sequence type; COL: colistin. ● Isolates typified by MLST.

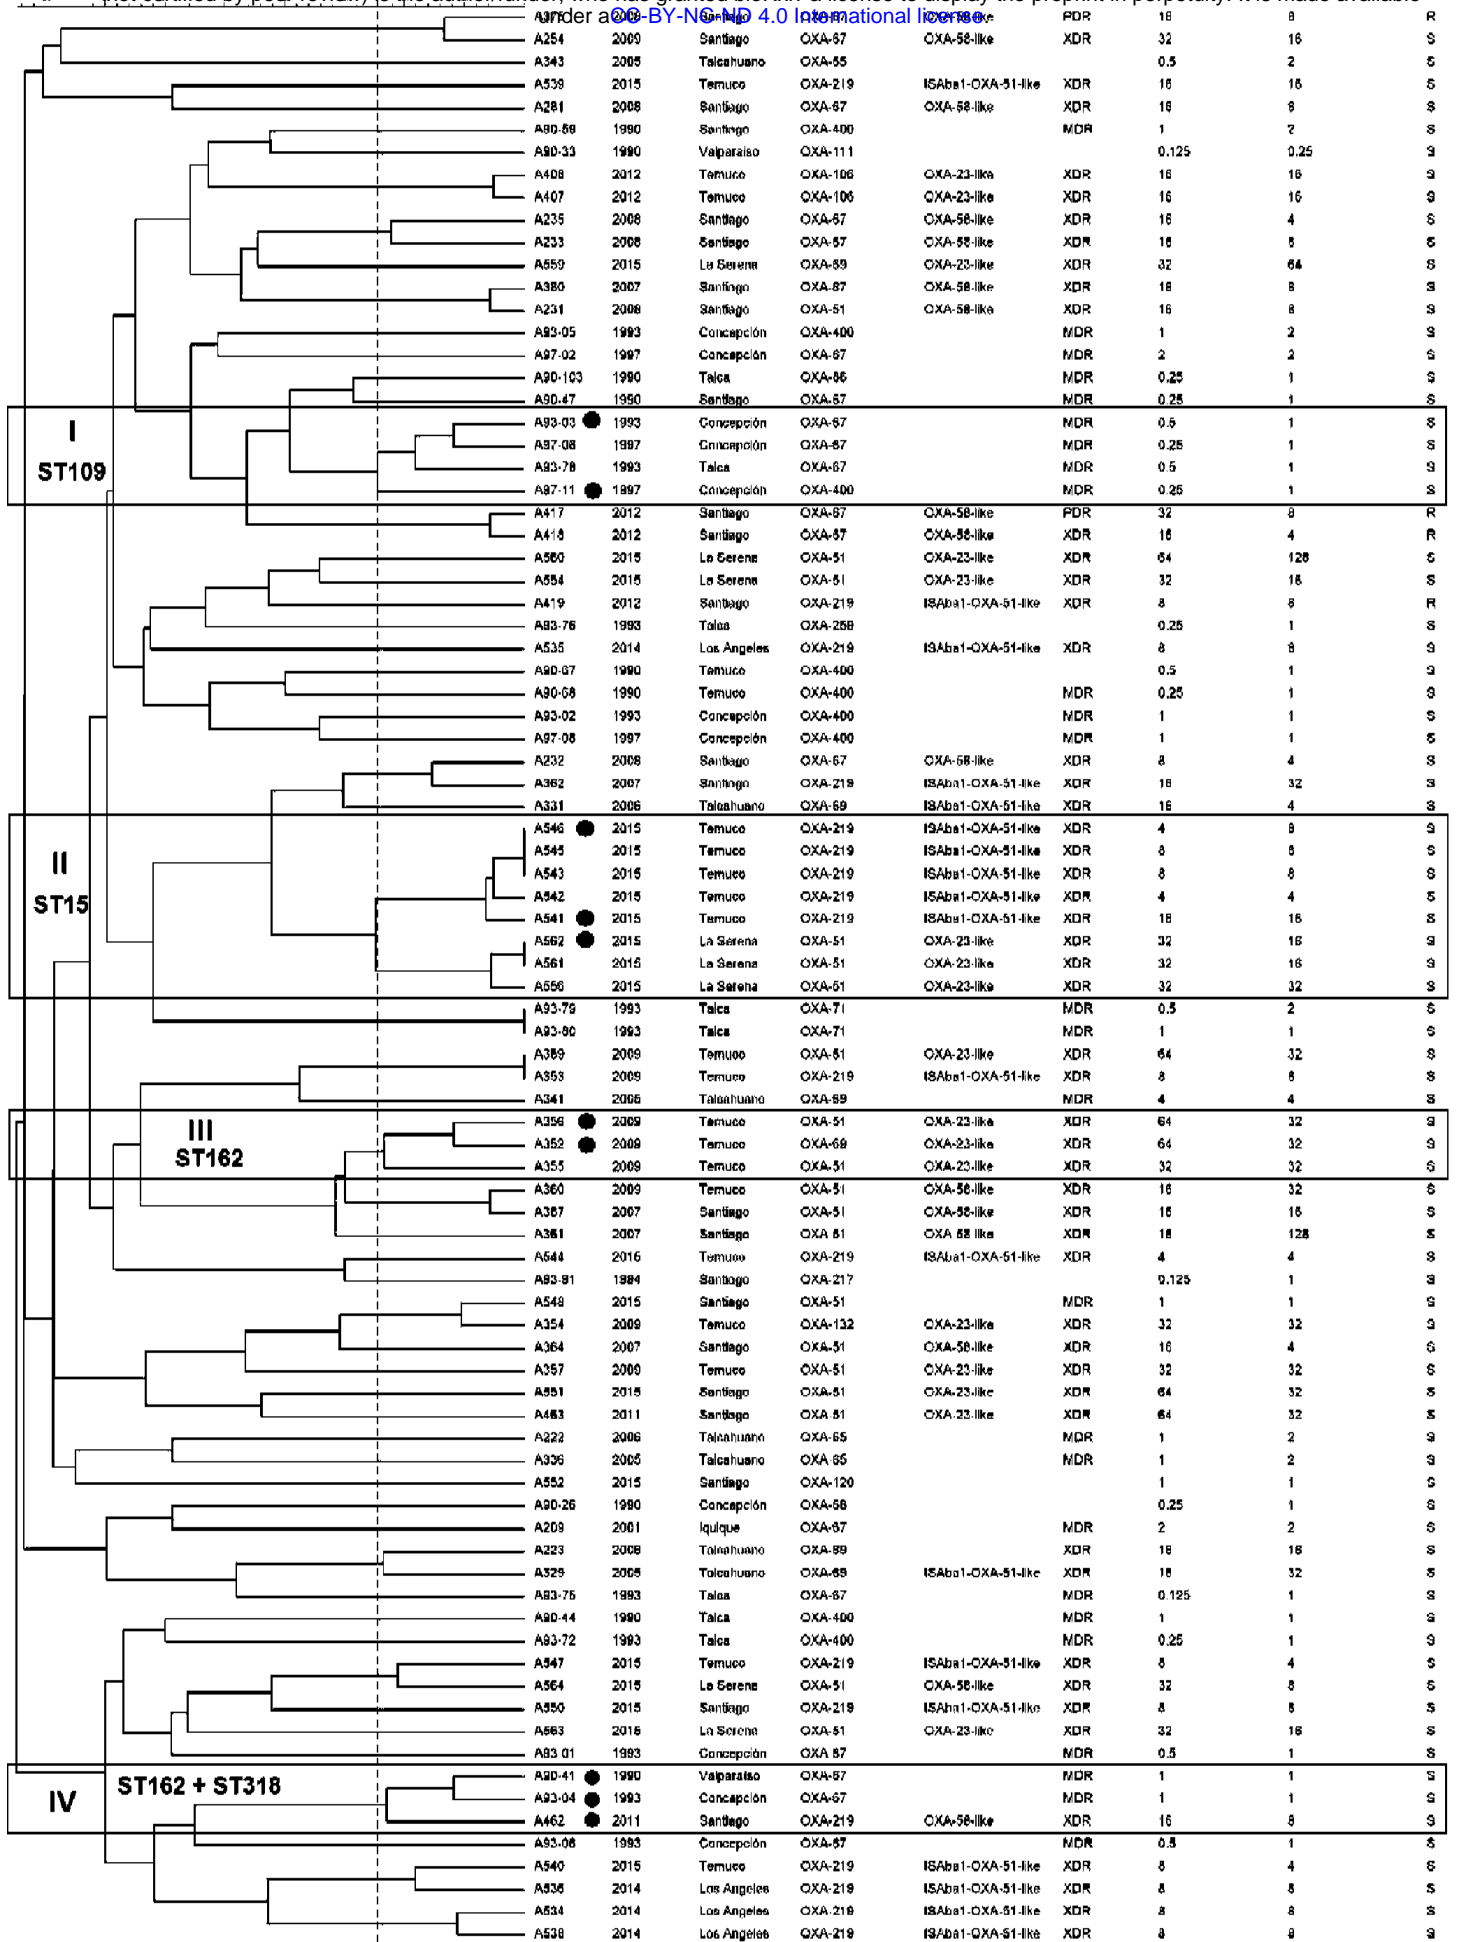

Source: https://www.biorxiv.org/content/10.1101/467589v1.full.pdf
